# Supplementary material for: Analysis of Epidemiological and Economic Impact of Foot-and-Mouth Disease Outbreaks in Four District Areas in Thailand
Source: Front Vet Sci. 2022 Jun 21;9:904630. doi: 10.3389/fvets.2022.904630 (PMC9253695; doi:10.3389/fvets.2022.904630)
Supplement: Supplementary file 1 [file Table_1.XLSX]

## Sheet: dairy_economic impact
ID	add_labour	dailymilkloss	outbreak_duration	pop_calf	pop_sickcalf	pop_deadcalf	pop_heifer	pop_sickheifer	pop_deadheifer	pop_cow	pop_sickcow	pop_deadcow	milkprice	vaccine	no_vetvisit	vetcostUS	vetcostpercowUS	labourcostUS	labourcostpercowUS	mortalitylossUS	mortalitylosspercowUS	milklossUS	milklosspercowUS	totallossUS	totallosspercowUS
1A02	4	6.6	24	4	0	3	6	3	3	50	12	0	17	3more	1	617.143	9.95392	102.857	1.65899	4971.43	80.1843	923.246	14.8911	6614.67	106.688
1A03	0	4	7	17	4	0	5	4	0	9	9	0	17	0to0	1	582.857	18.2143	0	0	0	0	122.4	3.825	705.257	22.0393
1A04	4	6	31	5	0	0	5	0	0	30	21	0	17	3more	5	1200	27.907	132.857	3.0897	0	0	1897.2	44.1209	3230.06	75.1176
1A10	3	10	31	25	0	0	15	0	0	40	30	0	16	2	3	1371.43	16.9312	99.6429	1.23016	0	0	4251.43	52.4868	5722.5	70.6481
1B03	3	6.66667	14	12	0	0	12	0	0	15	6	0	16.9	3more	0	171.429	4.18118	45	1.09756	0	0	270.4	6.59512	486.829	11.8739
1B04	0	3.6	15	2	0	0	11	0	0	13	13	0	16.9	3more	0	371.429	14.2857	0	0	0	0	338.966	13.0371	710.394	27.3229
1C02	4	5	31	3	3	0	0	0	0	6	2	3	16.9	2	1	171.429	17.1429	132.857	13.2857	2357.14	235.714	149.686	14.9686	2811.11	281.111
1C03	2	4.28571	7	4	0	0	4	0	0	7	5	0	16	0to0	0	142.857	9.52381	15	1	0	0	68.5714	4.57143	226.429	15.0952
1C10	4	6	7	11	0	0	10	0	0	15	1	0	16.9	3more	0	28.5714	0.732601	30	0.769231	0	0	20.28	0.52	78.8514	2.02183
1D05	5	2.6	31	3	0	0	0	0	0	5	4	0	17	3more	2	160	17.7778	166.071	18.4524	0	0	156.594	17.3994	482.666	53.6295
2A01	2	3.33333	30	25	0	0	20	0	0	30	20	0	17	0to0	1	685.714	8.06723	64.2857	0.756303	0	0	971.429	11.4286	1721.43	20.2521
2A03	5	7.5	7	8	0	0	12	0	0	20	10	1	18	3more	1	342.857	7.61905	37.5	0.833333	785.714	17.4603	270	6	1436.07	31.9127
2A05	3	10	14	10	5	5	22	0	0	30	18	0	17.6	3more	0	800	11.5942	45	0.652174	428.571	6.21118	1267.2	18.3652	2540.77	36.8228
2A06	4	5.55556	31	8	7	0	15	0	0	27	30	0	17	0to0	2	1480	26.9091	132.857	2.41558	0	0	2509.52	45.6277	4122.38	74.9524
2A07	3	7.77778	7	4	0	0	4	0	0	9	7	1	16	2	1	240	13.3333	22.5	1.25	785.714	43.6508	174.222	9.67901	1222.44	67.9131
2B03	3	4	14	12	0	0	12	0	0	50	8	0	17.9	3more	0	228.571	3.00752	45	0.592105	0	0	229.12	3.01474	502.691	6.61436
2B04	2	10	15	18	0	0	9	0	0	30	30	0	18	2	0	857.143	13.8249	32.1429	0.518433	0	0	2314.29	37.3272	3203.57	51.6705
2B05	5	5.5	31	6	0	0	10	0	0	40	40	0	18	3more	0	1142.86	19.3705	166.071	2.81477	0	0	3507.43	59.4479	4816.36	81.6332
2B06	4	5.29412	7	1	0	0	2	0	0	17	19	0	17.8	3more	0	542.857	22.619	30	1.25	0	0	358.094	14.9206	930.951	38.7896
2C03	0	7.5	7	7	0	0	19	0	0	20	5	0	16	3more	0	142.857	2.80112	0	0	0	0	120	2.35294	262.857	5.15406
2C06	0	4.85714	14	2	0	0	7	0	0	35	19	0	17	3more	3	868.571	19.3016	0	0	0	0	627.543	13.9454	1496.11	33.247
2C07	2	2	7	5	0	0	4	0	0	10	13	0	16	3more	1	445.714	18.5714	15	0.625	0	0	83.2	3.46667	543.914	22.6631
2C10	0	9.72222	31	17	6	0	14	0	0	18	8	0	17	0to0	0	400	7.27273	0	0	0	0	1171.11	21.2929	1571.11	28.5657
2D06	0	7.87879	14	10	0	0	10	0	0	33	30	0	16.9	3more	0	857.143	14.5278	0	0	0	0	1597.82	27.0817	2454.96	41.6095
2D07	5	4.28571	31	8	0	2	0	0	0	35	30	0	17	3more	1	1097.14	25.515	166.071	3.86213	171.429	3.98671	1935.92	45.0214	3370.56	78.3851
2D09	0	13.75	7	0	0	0	4	4	4	16	15	0	17	0to0	0	542.857	27.1429	0	0	6285.71	314.286	701.25	35.0625	7529.82	376.491
3A01	0	0.875	7	3	2	0	13	0	0	24	2	0	17	3more	0	114.286	2.38095	0	0	0	0	5.95	0.123958	120.236	2.50491
3A02	3	0.740741	6	6	6	0	4	0	0	27	21	0	17	3more	0	771.429	18.8153	19.2857	0.470383	0	0	45.3333	1.10569	836.048	20.3914
3A06	0	4	31	10	0	0	6	0	0	20	2	0	16	3more	0	57.1429	1.5873	0	0	0	0	113.371	3.14921	170.514	4.73651
3A08	3	3.33333	7	5	1	0	0	0	0	45	40	0	17	2	0	1171.43	19.5238	22.5	0.375	0	0	453.333	7.55556	1647.26	27.4544
3A09	6	6.8	30	3	0	0	2	0	0	25	20	0	17	0to0	0	571.429	17.8571	192.857	6.02679	0	0	1981.71	61.9286	2746	85.8125
3B01	2	7.69231	14	4	0	0	4	0	0	13	15	0	17.9	0to0	2	600	22.2222	30	1.11111	0	0	826.154	30.5983	1456.15	53.9316
3B02	2	5	31	12	0	0	17	0	0	30	8	0	18	3more	0	228.571	3.74707	66.4286	1.08899	0	0	637.714	10.4543	932.714	15.2904
3B07	5	2	6	7	0	0	12	0	0	30	3	0	17	2	0	85.7143	1.74927	32.1429	0.655977	0	0	17.4857	0.356851	135.343	2.7621
3B08	5	1.66667	31	12	0	0	18	0	0	60	30	0	16.4	2	1	1028.57	10.8271	166.071	1.74812	0	0	726.286	7.64511	1920.93	20.2203
3B09	5	3.33333	31	12	0	0	18	0	0	30	30	0	16.4	2	1	1028.57	15.8242	166.071	2.55495	0	0	1452.57	22.3473	2647.21	40.7264
3C01	2	2	7	13	0	0	24	0	0	50	15	1	18	3more	3	685.714	7.29483	15	0.159574	785.714	8.35866	108	1.14894	1594.43	16.962
3C04	5	5.33333	28	10	0	0	9	0	0	45	45	0	16	3more	1	1542.86	22.3602	150	2.17391	0	0	3072	44.5217	4764.86	69.0559
3C06	3	3.33333	15	4	0	0	9	0	0	60	55	0	16	3more	3	2514.29	33.5238	48.2143	0.642857	0	0	1257.14	16.7619	3819.64	50.9286
3C08	4	2.5	6	3	0	0	3	0	0	20	10	0	16.4	0to0	0	285.714	9.85222	25.7143	0.8867	0	0	70.2857	2.42365	381.714	13.1626
3D04	5	5	28	4	0	2	12	0	0	28	25	3	17	3more	0	771.429	17.5325	150	3.40909	2528.57	57.4675	1700	38.6364	5150	117.045
3D08	3	4.8	14	5	1	0	6	0	0	25	5	5	17	3more	4	308.571	8.57143	45	1.25	3928.57	109.127	163.2	4.53333	4445.34	123.482
3D09	4	7.09677	20	13	0	0	9	0	0	31	25	6	17	3more	1	857.143	15.873	85.7143	1.5873	4714.29	87.3016	1723.5	31.9167	7380.65	136.679
4A01	1	2.94118	28	6	0	2	5	0	0	17	14	1	18	0to0	5	914.286	32.6531	30	1.07143	957.143	34.1837	592.941	21.1765	2494.37	89.0846
4A04	6	10	45	10	0	7	30	0	0	60	68	0	16.8	0to0	0	2142.86	17.8571	289.286	2.41071	600	5	14688	122.4	17720.1	147.668
4A05	2	5	28	7	0	0	10	0	0	23	15	0	16.8	2	2	600	14.6341	60	1.46341	0	0	1008	24.5854	1668	40.6829
4A07	8	3.175	31	3	0	0	15	0	0	40	25	0	17	2	0	714.286	11.7096	265.714	4.35597	0	0	1195.16	19.5928	2175.16	35.6584
4A08	9	8.88889	31	4	0	0	12	0	0	18	20	0	17	2	1	685.714	18.0451	298.929	7.86654	0	0	2676.83	70.4428	3661.47	96.3544
4B02	4	0.869565	28	7	0	0	11	0	0	23	10	0	17.9	0to0	5	571.429	13.289	120	2.7907	0	0	124.522	2.89585	815.95	18.9756
4B03	5	17.3684	31	4	0	0	7	0	0	19	20	0	15	2	1	685.714	19.0476	166.071	4.6131	0	0	4615.04	128.195	5466.82	151.856
4B07	4	6	14	2	0	0	9	0	0	5	3	0	17	0to0	2	120	6.66667	60	3.33333	0	0	122.4	6.8	302.4	16.8
4B08	6	2.25	30	14	0	3	10	0	0	40	15	0	17.9	3more	2	720	10.4348	192.857	2.79503	257.143	3.72671	517.821	7.50466	1687.82	24.4612
4C02	0	6.66667	28	3	2	0	11	0	0	9	10	0	16	3more	1	411.429	16.4571	0	0	0	0	853.333	34.1333	1264.76	50.5905
4C08	6	1.66667	14	7	0	0	10	0	0	18	7	0	16	3more	0	200	5.12821	90	2.30769	0	0	74.6667	1.91453	364.667	9.35043
4D01	3	2.08333	28	23	0	0	16	0	0	48	30	1	17.6	3more	1	1028.57	11.4286	90	1	785.714	8.73016	880	9.77778	2784.29	30.9365
4D03	2	5	30	6	0	0	5	0	0	15	4	0	17	2	0	114.286	4.08163	64.2857	2.29592	0	0	291.429	10.4082	470	16.7857
4D04	4	3.66667	31	10	6	0	18	0	0	30	20	0	16	3more	1	891.429	15.3695	132.857	2.29064	0	0	1039.24	17.9179	2063.52	35.578
4D06	5	5.5	30	3	0	0	2	0	0	20	2	0	14.5	2	1	68.5714	2.63736	160.714	6.18132	0	0	136.714	5.25824	366	14.0769
4D07	5	1.6	30	11	7	0	1	0	0	50	43	0	16	3more	0	1428.57	22.3214	160.714	2.51116	0	0	943.543	14.7429	2532.83	39.5754
4D08	10	3.33	28	2	0	0	13	0	0	15	8	2	16.8	2	0	228.571	7.61905	300	10	1571.43	52.381	358.042	11.9347	2458.04	81.9347

## Sheet: explanation
This excel file contains data from FMD economic impact of 60 dairy farms in Muak Lek district
ID	farm ID
add_labour	additional labour (hr/day)
dailymilkloss	daily milk loss per cow (kg/day)
outbreak_duration	outbeak duration (day)
pop_calf	number of calf
pop_sickcalf	number of sick calf
pop_deadcalf	number of dead calf
pop_heifer	number of heifer
pop_sickheifer	number of sick heifer
pop_deadheifer	number of dead heifer
pop_cow	number of cow
pop_sickcow	number of sick cow
pop_deadcow	number of dead cow
milkprice	milk price (Bath/ kg)
vaccine	vaccination frequency per year
no_vetvisit	number of vet visit
vetcostUS	Veterinary and medicine cost per farm (USD)
vetcostpercowUS	Veterinary and medicine cost per cow (USD)
labourcostUS	Additional labour cost per farm (USD)
labourcostpercowUS	Additional labour cost per cow (USD)
mortalitylossUS	Mortality loss per farm (USD)
mortalitylosspercowUS	Mortality loss per cow (USD)
milklossUS	Milk loss per farm (USD)
milklosspercowUS	Milk loss per cow (USD)
totallossUS	Total losses per farm (USD)
totallosspercowUS	Total losses per cow (USD)
