# Supplementary material for: Analysis of Epidemiological and Economic Impact of Foot-and-Mouth Disease Outbreaks in Four District Areas in Thailand
Source: Front Vet Sci. 2022 Jun 21;9:904630. doi: 10.3389/fvets.2022.904630 (PMC9253695; doi:10.3389/fvets.2022.904630)
Supplement: Supplementary file 2 [file Table_2.XLSX]

## Sheet: epidem_beeffarm
ID	place	status	popsick	pop	vaccine
6	Banpong	calf	1	4	0to1
7	Banpong	calf	0	9	0to1
10	Banpong	calf	0	7	0to1
12	Banpong	calf	0	30	0to1
20	Banpong	calf	0	4	0to1
24	Banpong	calf	0	1	0to1
27	Banpong	calf	5	8	0to1
33	Banpong	calf	0	4	0to1
34	Boploy	calf	0	1	2more
35	Boploy	calf	0	30	2more
37	Boploy	calf	0	7	2more
43	Boploy	calf	0	3	2more
45	Boploy	calf	1	5	0to1
53	Boploy	calf	0	6	0to1
58	Boploy	calf	0	4	2more
69	Boploy	calf	0	4	2more
83	Boploy	calf	0	20	2more
92	Boploy	calf	2	10	2more
113	Boploy	calf	0	10	2more
114	Boploy	calf	0	13	2more
118	Boploy	calf	0	6	2more
137	Boploy	calf	0	5	2more
153	Boploy	calf	5	7	2more
157	Boploy	calf	0	20	2more
158	Boploy	calf	0	8	2more
170	Banpong	calf	10	20	2more
184	Banpong	calf	0	1	0to1
210	Banpong	calf	0	1	0to1
223	Banpong	calf	0	20	0to1
1	Banpong	noncalf	3	21	2more
2	Banpong	noncalf	1	2	0to1
6	Banpong	noncalf	7	7	0to1
7	Banpong	noncalf	4	26	0to1
8	Banpong	noncalf	1	10	0to1
10	Banpong	noncalf	3	9	0to1
12	Banpong	noncalf	3	62	0to1
20	Banpong	noncalf	6	8	0to1
24	Banpong	noncalf	1	1	0to1
27	Banpong	noncalf	8	23	0to1
33	Banpong	noncalf	7	16	0to1
34	Boploy	noncalf	10	96	2more
35	Boploy	noncalf	90	102	2more
37	Boploy	noncalf	27	98	2more
38	Boploy	noncalf	57	69	2more
43	Boploy	noncalf	15	55	2more
45	Boploy	noncalf	6	22	0to1
51	Boploy	noncalf	10	300	0to1
53	Boploy	noncalf	25	150	0to1
58	Boploy	noncalf	14	80	2more
67	Boploy	noncalf	5	41	2more
69	Boploy	noncalf	5	12	2more
83	Boploy	noncalf	50	72	2more
92	Boploy	noncalf	79	90	2more
93	Boploy	noncalf	5	20	2more
94	Boploy	noncalf	7	20	0to1
95	Boploy	noncalf	5	23	0to1
113	Boploy	noncalf	6	42	2more
114	Boploy	noncalf	5	113	2more
118	Boploy	noncalf	7	24	2more
137	Boploy	noncalf	2	18	2more
143	Boploy	noncalf	20	20	2more
145	Boploy	noncalf	100	270	2more
152	Boploy	noncalf	13	25	2more
153	Boploy	noncalf	11	47	2more
157	Boploy	noncalf	10	56	2more
158	Boploy	noncalf	1	17	2more
170	Banpong	noncalf	41	51	2more
178	Banpong	noncalf	20	27	0to1
183	Banpong	noncalf	12	122	0to1
184	Banpong	noncalf	2	7	0to1
187	Banpong	noncalf	2	8	0to1
188	Banpong	noncalf	10	30	2more
194	Banpong	noncalf	5	5	0to1
197	Banpong	noncalf	5	5	0to1
199	Banpong	noncalf	30	102	2more
210	Banpong	noncalf	4	4	0to1
211	Banpong	noncalf	30	41	0to1
212	Banpong	noncalf	1	3	2more
220	Banpong	noncalf	2	8	0to1
221	Banpong	noncalf	10	35	0to1
223	Banpong	noncalf	10	109	0to1
226	Banpong	noncalf	31	31	0to1
232	Banpong	noncalf	15	20	0to1
241	Banpong	noncalf	5	50	0to1

## Sheet: Explanation
This excel file contains FMD epidemiological impact on beef farms. Each row contain mortality and morbidity for each animal categories in each farms
If the farms don't have population of animal categories. There will be no row for that animal categories for that farm ID.
ID	Farm ID column (some ID might be skipped)
place	areas of the farm
status	animal categories
popsick	number of sick animal
pop	number of total animal
vaccine	number of FMD vaccination per year
