# Supplementary material for: Analysis of Epidemiological and Economic Impact of Foot-and-Mouth Disease Outbreaks in Four District Areas in Thailand
Source: Front Vet Sci. 2022 Jun 21;9:904630. doi: 10.3389/fvets.2022.904630 (PMC9253695; doi:10.3389/fvets.2022.904630)
Supplement: Supplementary file 3 [file Table_3.XLSX]

## Sheet: epidem_dairyfarm
ID	place	status	popsick	popdead	pop	vaccine
1	Muak Lek	calf	0	0	2	0to1
1	Muak Lek	heifer	0	0	6	0to1
1	Muak Lek	adult	6	0	20	0to1
2	Muak Lek	calf	0	0	2	0to1
2	Muak Lek	heifer	0	0	10	0to1
2	Muak Lek	adult	3	0	26	0to1
3	Muak Lek	calf	4	0	11	0to1
3	Muak Lek	heifer	5	0	13	0to1
3	Muak Lek	adult	20	0	23	0to1
6	Muak Lek	calf	7	0	10	2
6	Muak Lek	heifer	9	0	10	2
6	Muak Lek	adult	19	0	22	2
7	Muak Lek	calf	0	0	10	2
7	Muak Lek	heifer	0	0	6	2
7	Muak Lek	adult	6	1	11	2
8	Muak Lek	heifer	0	0	3	2
8	Muak Lek	adult	5	0	7	2
9	Muak Lek	adult	10	0	16	2
10	Muak Lek	calf	0	0	5	2
10	Muak Lek	heifer	4	0	7	2
10	Muak Lek	adult	6	0	17	2
11	Muak Lek	calf	0	0	4	2
11	Muak Lek	heifer	2	2	8	2
11	Muak Lek	adult	0	0	11	2
12	Muak Lek	calf	0	0	2	2
12	Muak Lek	heifer	0	0	2	2
12	Muak Lek	adult	5	0	8	2
13	Muak Lek	calf	0	0	4	2
13	Muak Lek	heifer	2	0	12	2
13	Muak Lek	adult	5	0	21	2
14	Muak Lek	adult	1	0	7	2
15	Muak Lek	calf	0	0	5	2
15	Muak Lek	heifer	0	0	5	2
15	Muak Lek	adult	14	0	26	2
16	Muak Lek	calf	0	0	7	2
16	Muak Lek	heifer	0	0	6	2
16	Muak Lek	adult	15	0	19	2
17	Muak Lek	calf	2	0	5	2
17	Muak Lek	heifer	6	0	24	2
17	Muak Lek	adult	5	0	66	2
18	Muak Lek	heifer	20	0	20	2
18	Muak Lek	adult	20	0	28	2
19	Muak Lek	calf	3	3	7	2
19	Muak Lek	heifer	0	0	12	2
19	Muak Lek	adult	25	2	80	2
20	Muak Lek	calf	0	0	1	2
20	Muak Lek	heifer	0	0	6	2
20	Muak Lek	adult	1	0	8	2
21	Muak Lek	calf	0	2	6	2
21	Muak Lek	heifer	0	0	18	2
21	Muak Lek	adult	15	0	40	2
22	Muak Lek	calf	1	0	38	2
22	Muak Lek	heifer	10	0	25	2
22	Muak Lek	adult	0	0	45	2
23	Muak Lek	calf	2	0	2	2
23	Muak Lek	heifer	5	0	7	2
23	Muak Lek	adult	7	0	19	2
24	Muak Lek	calf	7	0	7	2
24	Muak Lek	heifer	10	0	10	2
24	Muak Lek	adult	13	0	19	2
31	Muak Lek	calf	3	1	6	2
31	Muak Lek	heifer	9	2	35	2
31	Muak Lek	adult	30	10	48	2
47	Muak Lek	calf	0	0	4	3more
47	Muak Lek	heifer	8	0	8	3more
47	Muak Lek	adult	12	0	16	3more
48	Muak Lek	calf	10	10	10	3more
48	Muak Lek	heifer	6	0	6	3more
48	Muak Lek	adult	25	0	25	3more
49	Muak Lek	calf	0	0	15	3more
49	Muak Lek	adult	2	0	46	3more
50	Muak Lek	calf	0	0	10	3more
50	Muak Lek	heifer	0	0	5	3more
50	Muak Lek	adult	15	0	37	3more
51	Muak Lek	calf	0	0	15	3more
51	Muak Lek	heifer	3	0	24	3more
51	Muak Lek	adult	6	0	32	3more
52	Muak Lek	calf	0	0	11	3more
52	Muak Lek	heifer	0	0	8	3more
52	Muak Lek	adult	5	2	17	3more
53	Muak Lek	calf	0	0	4	3more
53	Muak Lek	heifer	0	0	18	3more
53	Muak Lek	adult	23	0	28	3more
54	Muak Lek	calf	0	0	3	3more
54	Muak Lek	heifer	1	0	7	3more
54	Muak Lek	adult	0	0	12	3more
55	Muak Lek	calf	3	0	3	3more
55	Muak Lek	heifer	3	0	6	3more
55	Muak Lek	adult	11	0	19	3more
56	Muak Lek	calf	5	0	5	3more
56	Muak Lek	heifer	0	0	2	3more
56	Muak Lek	adult	16	0	20	3more
57	Muak Lek	calf	1	0	8	3more
57	Muak Lek	heifer	0	0	10	3more
57	Muak Lek	adult	22	0	29	3more
58	Muak Lek	calf	0	0	2	3more
58	Muak Lek	heifer	0	0	1	3more
58	Muak Lek	adult	3	0	42	3more
59	Muak Lek	heifer	0	0	30	3more
59	Muak Lek	adult	5	0	17	3more
60	Muak Lek	calf	0	0	1	3more
60	Muak Lek	heifer	0	0	2	3more
60	Muak Lek	adult	1	0	6	3more
61	Muak Lek	heifer	0	0	8	3more
61	Muak Lek	adult	7	0	21	3more
62	Muak Lek	calf	3	0	5	3more
62	Muak Lek	heifer	0	0	5	3more
62	Muak Lek	adult	6	0	23	3more
63	Muak Lek	calf	0	0	3	3more
63	Muak Lek	heifer	3	0	6	3more
63	Muak Lek	adult	4	0	6	3more
64	Muak Lek	calf	0	0	7	3more
64	Muak Lek	heifer	15	0	32	3more
64	Muak Lek	adult	20	0	61	3more
65	Muak Lek	calf	0	0	10	3more
65	Muak Lek	heifer	10	0	10	3more
65	Muak Lek	adult	30	5	30	3more
66	Muak Lek	calf	0	0	2	3more
66	Muak Lek	heifer	0	0	5	3more
66	Muak Lek	adult	39	1	44	3more
67	Muak Lek	calf	0	0	2	3more
67	Muak Lek	heifer	0	0	5	3more
67	Muak Lek	adult	3	0	19	3more
68	Muak Lek	adult	2	0	16	3more
69	Muak Lek	calf	0	0	3	3more
69	Muak Lek	heifer	0	0	6	3more
69	Muak Lek	adult	9	0	22	3more
70	Muak Lek	calf	4	0	4	3more
70	Muak Lek	heifer	12	0	14	3more
70	Muak Lek	adult	24	0	30	3more
71	Muak Lek	calf	6	0	6	3more
71	Muak Lek	heifer	14	0	14	3more
71	Muak Lek	adult	22	0	22	3more
72	Muak Lek	calf	0	0	5	3more
72	Muak Lek	heifer	3	0	13	3more
72	Muak Lek	adult	12	0	26	3more
73	Muak Lek	calf	0	0	4	3more
73	Muak Lek	heifer	2	0	20	3more
73	Muak Lek	adult	30	0	60	3more
74	Muak Lek	calf	0	0	3	3more
74	Muak Lek	heifer	0	0	5	3more
74	Muak Lek	adult	4	0	8	3more
75	Muak Lek	calf	0	0	15	3more
75	Muak Lek	heifer	0	0	60	3more
75	Muak Lek	adult	20	0	50	3more
76	Muak Lek	adult	3	0	69	3more
77	Muak Lek	calf	0	0	1	3more
77	Muak Lek	heifer	8	0	17	3more
77	Muak Lek	adult	3	0	18	3more
78	Muak Lek	calf	1	0	3	3more
78	Muak Lek	heifer	5	0	16	3more
78	Muak Lek	adult	7	0	44	3more
79	Muak Lek	calf	0	0	7	3more
79	Muak Lek	heifer	0	0	26	3more
79	Muak Lek	adult	14	0	36	3more
80	Muak Lek	calf	0	0	4	3more
80	Muak Lek	heifer	0	0	4	3more
80	Muak Lek	adult	1	0	8	3more
81	Muak Lek	calf	0	0	8	3more
81	Muak Lek	heifer	25	0	30	3more
81	Muak Lek	adult	30	0	50	3more
82	Muak Lek	calf	0	0	2	3more
82	Muak Lek	heifer	3	0	12	3more
82	Muak Lek	adult	6	0	21	3more
83	Muak Lek	calf	0	0	3	3more
83	Muak Lek	heifer	5	0	25	3more
83	Muak Lek	adult	39	2	41	3more
84	Muak Lek	calf	0	0	10	3more
84	Muak Lek	heifer	0	0	1	3more
84	Muak Lek	adult	21	0	33	3more
85	Muak Lek	calf	0	0	3	3more
85	Muak Lek	heifer	0	0	9	3more
85	Muak Lek	adult	5	0	14	3more
86	Muak Lek	calf	0	0	7	3more
86	Muak Lek	heifer	15	0	18	3more
86	Muak Lek	adult	18	0	30	3more
87	Muak Lek	calf	0	0	4	3more
87	Muak Lek	heifer	5	0	12	3more
87	Muak Lek	adult	5	0	21	3more
88	Muak Lek	calf	0	0	3	3more
88	Muak Lek	heifer	0	0	6	3more
88	Muak Lek	adult	5	0	21	3more
89	Muak Lek	calf	2	0	2	3more
89	Muak Lek	heifer	12	0	12	3more
89	Muak Lek	adult	13	0	17	3more
90	Muak Lek	calf	6	0	6	3more
90	Muak Lek	heifer	17	0	30	3more
90	Muak Lek	adult	50	0	50	3more
91	Muak Lek	calf	0	0	3	3more
91	Muak Lek	heifer	0	0	4	3more
91	Muak Lek	adult	3	0	9	3more
92	Muak Lek	calf	0	0	8	3more
92	Muak Lek	heifer	10	0	25	3more
92	Muak Lek	adult	20	0	37	3more
93	Muak Lek	calf	0	0	8	3more
93	Muak Lek	heifer	0	0	8	3more
93	Muak Lek	adult	18	0	24	3more
94	Muak Lek	calf	0	0	3	3more
94	Muak Lek	heifer	0	0	7	3more
94	Muak Lek	adult	5	0	23	3more
95	Muak Lek	calf	0	0	6	3more
95	Muak Lek	heifer	5	0	11	3more
95	Muak Lek	adult	16	0	21	3more
96	Muak Lek	calf	5	0	15	3more
96	Muak Lek	heifer	33	9	33	3more
96	Muak Lek	adult	39	1	40	3more
97	Muak Lek	calf	0	0	18	3more
97	Muak Lek	heifer	30	0	30	3more
97	Muak Lek	adult	29	0	39	3more
98	Muak Lek	heifer	0	0	5	3more
98	Muak Lek	adult	7	0	8	3more
99	Muak Lek	calf	50	0	50	3more
99	Muak Lek	heifer	50	0	50	3more
99	Muak Lek	adult	60	0	60	3more
100	Muak Lek	calf	1	0	20	3more
100	Muak Lek	heifer	5	0	25	3more
100	Muak Lek	adult	20	0	55	3more
101	Muak Lek	calf	0	0	6	3more
101	Muak Lek	heifer	1	0	5	3more
101	Muak Lek	adult	8	0	26	3more
102	Muak Lek	calf	0	0	2	3more
102	Muak Lek	heifer	3	0	9	3more
102	Muak Lek	adult	20	0	22	3more
103	Muak Lek	calf	0	0	10	3more
103	Muak Lek	heifer	4	0	11	3more
103	Muak Lek	adult	20	0	21	3more
104	Muak Lek	calf	0	0	2	3more
104	Muak Lek	heifer	0	0	13	3more
104	Muak Lek	adult	4	0	22	3more
105	Muak Lek	calf	0	0	2	3more
105	Muak Lek	heifer	1	0	14	3more
105	Muak Lek	adult	7	0	31	3more
106	Muak Lek	calf	0	0	10	3more
106	Muak Lek	heifer	0	0	25	3more
106	Muak Lek	adult	60	0	80	3more
107	Muak Lek	calf	0	0	1	3more
107	Muak Lek	heifer	0	0	21	3more
107	Muak Lek	adult	23	0	30	3more
108	Muak Lek	heifer	0	0	6	3more
108	Muak Lek	adult	6	0	20	3more
109	Muak Lek	calf	6	0	8	3more
109	Muak Lek	heifer	35	0	36	3more
109	Muak Lek	adult	80	0	85	3more
110	Muak Lek	calf	0	0	3	3more
110	Muak Lek	heifer	0	0	13	3more
110	Muak Lek	adult	12	0	26	3more
111	Muak Lek	calf	0	0	6	3more
111	Muak Lek	heifer	40	1	40	3more
111	Muak Lek	adult	25	0	60	3more
112	Muak Lek	calf	0	0	4	3more
112	Muak Lek	heifer	0	0	10	3more
112	Muak Lek	adult	2	0	29	3more
113	Muak Lek	calf	3	0	4	3more
113	Muak Lek	heifer	15	0	30	3more
113	Muak Lek	adult	30	0	56	3more
114	Muak Lek	calf	0	0	10	3more
114	Muak Lek	heifer	6	0	16	3more
114	Muak Lek	adult	11	0	40	3more
153	Muak Lek	calf	0	0	5	3more
153	Muak Lek	heifer	0	0	12	3more
153	Muak Lek	adult	4	0	16	3more
156	Muak Lek	calf	0	0	3	3more
156	Muak Lek	heifer	0	0	11	3more
156	Muak Lek	adult	4	0	21	3more
159	Muak Lek	calf	0	0	5	3more
159	Muak Lek	heifer	0	0	6	3more
159	Muak Lek	adult	1	0	13	3more
160	Muak Lek	calf	20	0	20	3more
160	Muak Lek	heifer	25	0	25	3more
160	Muak Lek	adult	50	0	50	3more
161	Muak Lek	calf	0	0	4	3more
161	Muak Lek	heifer	0	0	32	3more
161	Muak Lek	adult	43	0	50	3more
162	Muak Lek	calf	0	0	6	3more
162	Muak Lek	heifer	15	0	27	3more
162	Muak Lek	adult	47	0	47	3more
163	Muak Lek	calf	20	0	20	3more
163	Muak Lek	heifer	20	0	20	3more
163	Muak Lek	adult	30	0	50	3more
177	Muak Lek	calf	0	0	13	3more
177	Muak Lek	heifer	0	0	13	3more
177	Muak Lek	adult	30	0	40	3more
179	Muak Lek	heifer	0	0	3	0to1
179	Muak Lek	adult	4	0	10	0to1
180	Muak Lek	calf	0	0	3	0to1
180	Muak Lek	heifer	0	0	9	0to1
180	Muak Lek	adult	8	0	28	0to1
183	Muak Lek	calf	0	0	1	0to1
183	Muak Lek	heifer	0	0	2	0to1
183	Muak Lek	adult	2	0	9	0to1
184	Muak Lek	calf	0	0	30	0to1
184	Muak Lek	heifer	0	0	40	0to1
184	Muak Lek	adult	80	0	88	0to1
185	Muak Lek	calf	0	0	3	0to1
185	Muak Lek	heifer	3	0	3	0to1
185	Muak Lek	adult	0	0	5	0to1
186	Muak Lek	calf	0	0	3	0to1
186	Muak Lek	heifer	0	0	2	0to1
186	Muak Lek	adult	3	0	12	0to1
187	Muak Lek	calf	4	1	8	0to1
187	Muak Lek	heifer	0	0	13	0to1
187	Muak Lek	adult	10	0	30	0to1
188	Muak Lek	calf	0	0	3	0to1
188	Muak Lek	heifer	0	0	5	0to1
188	Muak Lek	adult	28	0	36	0to1
189	Muak Lek	calf	3	0	3	0to1
189	Muak Lek	heifer	7	2	7	0to1
189	Muak Lek	adult	8	0	8	0to1
190	Muak Lek	calf	0	0	7	0to1
190	Muak Lek	heifer	2	0	12	0to1
190	Muak Lek	adult	20	0	30	0to1
191	Muak Lek	calf	4	0	8	0to1
191	Muak Lek	heifer	18	0	29	0to1
191	Muak Lek	adult	50	0	65	0to1
203	Banpong	calf	0	0	1	0to1
203	Banpong	heifer	0	0	3	0to1
203	Banpong	adult	6	0	14	0to1
204	Banpong	calf	0	0	8	3more
204	Banpong	heifer	10	0	16	3more
204	Banpong	adult	0	0	25	3more
205	Banpong	calf	2	0	3	3more
205	Banpong	heifer	2	0	2	3more
205	Banpong	adult	10	0	12	3more
206	Banpong	calf	8	0	8	3more
206	Banpong	heifer	6	0	12	3more
206	Banpong	adult	16	0	19	3more
208	Banpong	heifer	8	0	8	2
209	Banpong	calf	0	0	4	2
209	Banpong	heifer	0	0	1	2
209	Banpong	adult	1	0	16	2
210	Banpong	calf	0	0	3	3more
210	Banpong	heifer	0	0	10	3more
210	Banpong	adult	1	0	30	3more
216	Banpong	calf	0	0	8	3more
216	Banpong	heifer	0	0	5	3more
216	Banpong	adult	3	0	56	3more
217	Banpong	calf	0	0	2	3more
217	Banpong	heifer	0	0	6	3more
217	Banpong	adult	6	0	29	3more
219	Banpong	heifer	0	0	8	2
219	Banpong	adult	2	0	25	2
220	Banpong	calf	0	0	6	2
220	Banpong	heifer	6	0	40	2
220	Banpong	adult	33	0	66	2
226	Banpong	calf	0	0	1	3more
226	Banpong	heifer	10	0	10	3more
226	Banpong	adult	0	0	9	3more
231	Banpong	calf	0	0	6	3more
231	Banpong	heifer	0	0	8	3more
231	Banpong	adult	2	0	12	3more
232	Banpong	calf	5	0	5	3more
232	Banpong	heifer	10	0	10	3more
232	Banpong	adult	9	0	9	3more
233	Banpong	calf	0	0	20	2
233	Banpong	heifer	0	0	18	2
233	Banpong	adult	40	0	45	2
234	Banpong	adult	10	0	28	2
236	Banpong	heifer	0	0	4	3more
236	Banpong	adult	1	0	7	3more
238	Banpong	heifer	7	0	7	3more
238	Banpong	adult	0	0	7	3more
239	Banpong	heifer	0	0	2	3more
239	Banpong	adult	2	2	8	3more
241	Banpong	calf	0	0	7	3more
241	Banpong	heifer	3	0	7	3more
241	Banpong	adult	1	0	30	3more
242	Banpong	calf	1	0	3	3more
242	Banpong	heifer	2	0	2	3more
242	Banpong	adult	10	0	11	3more
246	Banpong	calf	0	0	3	2
246	Banpong	heifer	8	0	8	2
246	Banpong	adult	2	0	12	2
255	Banpong	calf	0	0	2	2
255	Banpong	heifer	0	0	9	2
255	Banpong	adult	2	0	13	2
257	Banpong	heifer	0	0	2	3more
257	Banpong	adult	3	0	13	3more
258	Banpong	calf	0	0	7	3more
258	Banpong	heifer	0	0	10	3more
258	Banpong	adult	4	0	21	3more
260	Banpong	calf	0	0	14	2
260	Banpong	heifer	0	0	10	2
260	Banpong	adult	30	0	88	2
263	Banpong	calf	0	0	1	3more
263	Banpong	heifer	0	0	1	3more
263	Banpong	adult	2	0	8	3more
264	Banpong	calf	0	0	3	2
264	Banpong	heifer	4	0	8	2
264	Banpong	adult	10	0	48	2
266	Banpong	calf	0	0	6	3more
266	Banpong	heifer	2	0	5	3more
266	Banpong	adult	0	0	25	3more
268	Banpong	calf	0	0	2	3more
268	Banpong	heifer	2	0	6	3more
268	Banpong	adult	1	0	11	3more
269	Banpong	heifer	0	0	5	2
269	Banpong	adult	5	0	6	2
272	Banpong	calf	0	0	4	3more
272	Banpong	heifer	0	0	4	3more
272	Banpong	adult	5	0	20	3more
273	Banpong	calf	0	0	12	3more
273	Banpong	heifer	0	0	3	3more
273	Banpong	adult	4	0	27	3more
275	Banpong	calf	0	0	15	2
275	Banpong	heifer	25	0	35	2
275	Banpong	adult	8	0	68	2
277	Banpong	calf	5	0	5	3more
277	Banpong	adult	4	0	5	3more
281	Banpong	calf	0	0	5	3more
281	Banpong	heifer	0	0	2	3more
281	Banpong	adult	20	0	20	3more
282	Banpong	calf	0	0	2	2
282	Banpong	heifer	3	0	3	2
282	Banpong	adult	0	0	19	2
284	Banpong	calf	0	0	6	2
284	Banpong	heifer	6	0	30	2
284	Banpong	adult	0	0	32	2
285	Banpong	calf	0	0	3	3more
285	Banpong	heifer	5	0	10	3more
285	Banpong	adult	15	0	15	3more
286	Banpong	calf	0	0	11	3more
286	Banpong	heifer	3	0	20	3more
286	Banpong	adult	0	0	41	3more
288	Banpong	calf	0	0	2	3more
288	Banpong	heifer	7	1	8	3more
288	Banpong	adult	0	0	31	3more
290	Mueang Lamphun	calf	1	0	8	2
290	Mueang Lamphun	heifer	0	0	9	2
290	Mueang Lamphun	adult	3	0	81	2
291	Mueang Lamphun	calf	0	0	13	3more
291	Mueang Lamphun	heifer	1	0	5	3more
291	Mueang Lamphun	adult	4	0	35	3more
292	Mueang Lamphun	calf	0	0	12	3more
292	Mueang Lamphun	heifer	2	0	6	3more
292	Mueang Lamphun	adult	3	0	38	3more
293	Mueang Lamphun	calf	1	0	1	2
293	Mueang Lamphun	heifer	1	0	3	2
293	Mueang Lamphun	adult	3	0	10	2
294	Mueang Lamphun	calf	0	0	6	3more
294	Mueang Lamphun	heifer	3	0	6	3more
294	Mueang Lamphun	adult	7	0	43	3more
295	Mueang Lamphun	calf	1	0	3	3more
295	Mueang Lamphun	heifer	2	0	5	3more
295	Mueang Lamphun	adult	4	0	24	3more
296	Mueang Lamphun	calf	1	0	6	3more
296	Mueang Lamphun	heifer	0	0	4	3more
296	Mueang Lamphun	adult	2	0	35	3more
297	Mueang Lamphun	calf	1	0	3	2
297	Mueang Lamphun	heifer	0	0	2	2
297	Mueang Lamphun	adult	2	0	8	2
298	Mueang Lamphun	calf	1	0	8	3more
298	Mueang Lamphun	heifer	2	0	10	3more
298	Mueang Lamphun	adult	2	0	53	3more
299	Mueang Lamphun	calf	1	0	3	3more
299	Mueang Lamphun	heifer	0	0	2	3more
299	Mueang Lamphun	adult	4	0	25	3more
300	Mueang Lamphun	calf	0	0	6	2
300	Mueang Lamphun	heifer	0	0	3	2
300	Mueang Lamphun	adult	2	0	26	2
301	Mueang Lamphun	calf	0	0	12	3more
301	Mueang Lamphun	heifer	1	0	4	3more
301	Mueang Lamphun	adult	2	0	47	3more
302	Mueang Lamphun	calf	0	0	17	3more
302	Mueang Lamphun	heifer	0	0	2	3more
302	Mueang Lamphun	adult	2	0	10	3more
304	Mueang Lamphun	heifer	3	0	5	3more
304	Mueang Lamphun	adult	7	0	38	3more
305	Mueang Lamphun	calf	0	0	4	3more
305	Mueang Lamphun	heifer	0	0	2	3more
305	Mueang Lamphun	adult	3	0	11	3more
306	Mueang Lamphun	heifer	1	0	1	3more
306	Mueang Lamphun	adult	2	0	10	3more
307	Mueang Lamphun	calf	1	0	20	3more
307	Mueang Lamphun	heifer	2	0	3	3more
307	Mueang Lamphun	adult	2	0	28	3more
308	Mueang Lamphun	calf	2	0	5	3more
308	Mueang Lamphun	heifer	0	0	7	3more
308	Mueang Lamphun	adult	3	0	73	3more
309	Mueang Lamphun	calf	0	0	11	3more
309	Mueang Lamphun	heifer	1	0	7	3more
309	Mueang Lamphun	adult	3	0	26	3more
310	Mueang Lamphun	calf	0	0	38	3more
310	Mueang Lamphun	heifer	0	0	5	3more
310	Mueang Lamphun	adult	2	0	43	3more
311	Mueang Lamphun	calf	0	0	5	2
311	Mueang Lamphun	adult	21	0	58	2
312	Mueang Lamphun	adult	14	0	19	0to1
313	Mueang Lamphun	heifer	3	0	4	3more
313	Mueang Lamphun	adult	1	0	24	3more
314	Mueang Lamphun	calf	0	0	16	3more
314	Mueang Lamphun	heifer	0	0	3	3more
314	Mueang Lamphun	adult	2	0	33	3more
315	Mueang Lamphun	calf	0	0	24	3more
315	Mueang Lamphun	heifer	1	0	2	3more
315	Mueang Lamphun	adult	4	0	17	3more
316	Mueang Lamphun	calf	1	0	2	3more
316	Mueang Lamphun	heifer	0	0	3	3more
316	Mueang Lamphun	adult	3	0	39	3more
317	Mueang Lamphun	calf	0	0	28	3more
317	Mueang Lamphun	heifer	2	0	16	3more
317	Mueang Lamphun	adult	5	0	86	3more
318	Mueang Lamphun	calf	2	0	22	3more
318	Mueang Lamphun	heifer	4	0	10	3more
318	Mueang Lamphun	adult	6	0	63	3more
319	Mueang Lamphun	calf	0	0	5	3more
319	Mueang Lamphun	heifer	0	0	4	3more
319	Mueang Lamphun	adult	2	0	32	3more
320	Mueang Lamphun	calf	0	0	2	3more
320	Mueang Lamphun	adult	1	0	9	3more
321	Mueang Lamphun	calf	1	0	16	3more
321	Mueang Lamphun	heifer	0	0	3	3more
321	Mueang Lamphun	adult	4	0	20	3more
322	Mueang Lamphun	calf	0	0	10	3more
322	Mueang Lamphun	heifer	2	0	2	3more
322	Mueang Lamphun	adult	2	0	22	3more
323	Mueang Lamphun	calf	0	0	17	3more
323	Mueang Lamphun	heifer	2	0	11	3more
323	Mueang Lamphun	adult	2	0	27	3more
324	Mueang Lamphun	calf	0	0	5	3more
324	Mueang Lamphun	heifer	0	0	3	3more
324	Mueang Lamphun	adult	7	0	37	3more
325	Mueang Lamphun	calf	0	0	8	3more
325	Mueang Lamphun	heifer	2	0	14	3more
325	Mueang Lamphun	adult	3	0	19	3more
326	Mueang Lamphun	calf	1	0	7	3more
326	Mueang Lamphun	heifer	1	0	3	3more
326	Mueang Lamphun	adult	3	0	20	3more
327	Mueang Lamphun	calf	0	0	9	3more
327	Mueang Lamphun	heifer	0	0	5	3more
327	Mueang Lamphun	adult	3	0	24	3more
329	Mueang Lamphun	calf	0	0	14	2
329	Mueang Lamphun	heifer	0	0	10	2
329	Mueang Lamphun	adult	5	0	62	2
330	Mueang Lamphun	adult	4	0	5	0to1
331	Mueang Lamphun	calf	1	0	11	3more
331	Mueang Lamphun	heifer	3	0	3	3more
331	Mueang Lamphun	adult	3	0	27	3more
332	Mueang Lamphun	calf	1	0	2	3more
332	Mueang Lamphun	heifer	1	0	10	3more
332	Mueang Lamphun	adult	9	0	11	3more
333	Mueang Lamphun	calf	0	0	1	3more
333	Mueang Lamphun	heifer	0	0	1	3more
333	Mueang Lamphun	adult	2	0	10	3more

## Sheet: Explanation
This excel file contains FMD epidemiological impact on dairy farms. Each row contain mortality and morbidity for each animal categories in each farms
If the farms don't have population of animal categories. There will be no row for that animal categories for that farm ID.
ID	Farm ID column (some ID might be skipped)
place	areas of the farm
status	animal categories
popsick	number of sick animal
popdead	number of dead animal
pop	number of total animal
vaccine	number of FMD vaccination per year
