# Supplementary material for: Analysis of Epidemiological and Economic Impact of Foot-and-Mouth Disease Outbreaks in Four District Areas in Thailand
Source: Front Vet Sci. 2022 Jun 21;9:904630. doi: 10.3389/fvets.2022.904630 (PMC9253695; doi:10.3389/fvets.2022.904630)
Supplement: Supplementary file 4 [file Table_4.XLSX]

## Sheet: epidem_pigfarm
ID	place	status	popsick	popdead	pop	vaccine
1	Banpong	sow	1	0	33	3
1	Banpong	fatten	16	0	200	3
1	Banpong	young	0	0	130	3
3	Banpong	sow	5	0	430	3
3	Banpong	fatten	0	0	100	3
3	Banpong	young	20	0	1400	3
4	Banpong	sow	8	0	50	3
4	Banpong	young	17	0	130	3
5	Banpong	sow	30	0	400	2
5	Banpong	fatten	50	0	100	2
5	Banpong	young	0	0	750	2
8	Banpong	sow	35	0	150	3
8	Banpong	fatten	0	0	100	3
8	Banpong	young	0	0	200	3
9	Banpong	sow	0	0	570	2
9	Banpong	fatten	200	20	2000	2
9	Banpong	young	0	0	2000	2
10	Banpong	sow	19	0	19	1
10	Banpong	fatten	0	0	75	1
10	Banpong	young	20	20	20	1
11	Banpong	sow	100	20	200	3
11	Banpong	fatten	0	0	50	3
11	Banpong	young	150	150	600	3
12	Banpong	sow	0	0	700	3
12	Banpong	fatten	30	0	3000	3
12	Banpong	young	0	0	2000	3
15	Banpong	sow	20	0	150	3
15	Banpong	fatten	800	0	1000	3
15	Banpong	young	0	0	380	3
16	Banpong	sow	0	0	1064	3
16	Banpong	fatten	20	10	1160	3
16	Banpong	young	0	0	3500	3
32	Banpong	fatten	1400	300	2000	1
33	Banpong	sow	1000	0	2000	2
33	Banpong	fatten	0	0	10000	2
34	Banpong	fatten	5250	3750	7500	2
35	Banpong	sow	80	0	800	3
35	Banpong	fatten	1000	0	2000	3
36	Banpong	fatten	10000	0	10000	1
37	Banpong	fatten	150	18	200	1
38	Banpong	sow	495	0	1650	3
38	Banpong	fatten	12000	0	12000	3
38	Banpong	young	1800	0	6000	3
39	Banpong	fatten	7500	0	30000	3
40	Banpong	sow	300	0	1500	3
40	Banpong	fatten	400	0	2000	3
40	Banpong	young	600	0	3000	3
41	Banpong	sow	330	50	1100	3
41	Banpong	fatten	2500	1000	5000	3
41	Banpong	young	130	0	2500	3
42	Banpong	sow	640	2	800	3
44	Banpong	sow	70	15	3751	2
44	Banpong	fatten	4000	1000	14757	2
44	Banpong	young	30	10	5476	2
45	Mueang Lamphun	sow	0	0	3	2
45	Mueang Lamphun	fatten	3	0	35	2
45	Mueang Lamphun	young	0	0	17	2
53	Mueang Lamphun	sow	0	0	38	2
53	Mueang Lamphun	fatten	3	0	18	2
53	Mueang Lamphun	young	0	0	20	2

## Sheet: Explanation
This excel file contains FMD epidemiological impact on pig farms. Each row contain mortality and morbidity for each animal categories in each farms
If the farms don't have population of animal categories. There will be no row for that animal categories for that farm ID.
ID	Farm ID column (some ID might be skipped)
place	areas of the farm
status	animal categories
popsick	number of sick animal
popdead	number of dead animal
pop	number of total animal
vaccine	number of FMD vaccination per year
